# Supplementary material
Source: PubMed Central journal article supplement (PMC5566518)
Supplement: 10.1074_M117.786061_jbc.M117.786061-1.pdf [file 10.1074_M117.786061_jbc.M117.786061-1.pdf]

## Supplemental data

Electrostatic Interactions between the CTX Phage Minor Coat Protein and the Bacterial Host Receptor TolA Drives the Pathogenic Conversion of *Vibrio cholerae*.

Laetitia Houot, Romain Navarro, Matthieu Nouailler, Denis Duché, Françoise Guerlesquin and Roland Llobes.

Table of content :

- S1- Expression of the wild-type pIN-pIII-N1<sup>CTX</sup> His-tagged construct and individual cystein mutants.
  - S2- Expression and periplasmic transport of the pIII-N1 His-tagged constructs and point mutants of interest.
  - S3- List of *Vibrio cholerae* isolate genomes used to study TolA sequence conservation.
  - S4- Multiple TolAIII domain sequence alignment of representative members of the gammaproteobacteria family Vibrionaceae genus *Vibrio*
  - S5- Multiple TolAIII domain sequence alignment of representative members of the gammaproteobacteria family Vibrionaceae.
  - S6- Analysis of the TolAIII<sup>Vc</sup>/pIII-N1<sup>CTX</sup> complex interface using the open access tool 2P2I inspector
- Table S1 : Strains and plasmids used in the study
- Table S2 : Primers used in the study

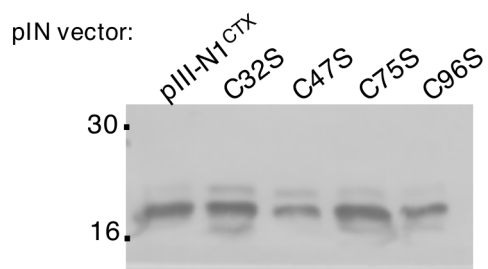

**Fig. S1 : Expression of the wild-type pIN-pIII-N1<sup>CTX</sup> His-tagged constructs and individual cysteine mutants.** Western immunoblot of 0.2 OD units of whole-cell lysates of *E. coli* DH5 $\alpha$  strain carrying pIN-pIII-N1<sup>CTX</sup>, or cysteine variants pIN-pIII-N1<sup>CTX</sup> C32S, C47S, C75S and C96S, and probed with anti-His antibody. The molecular weight markers (in kDa) are indicated on the left.

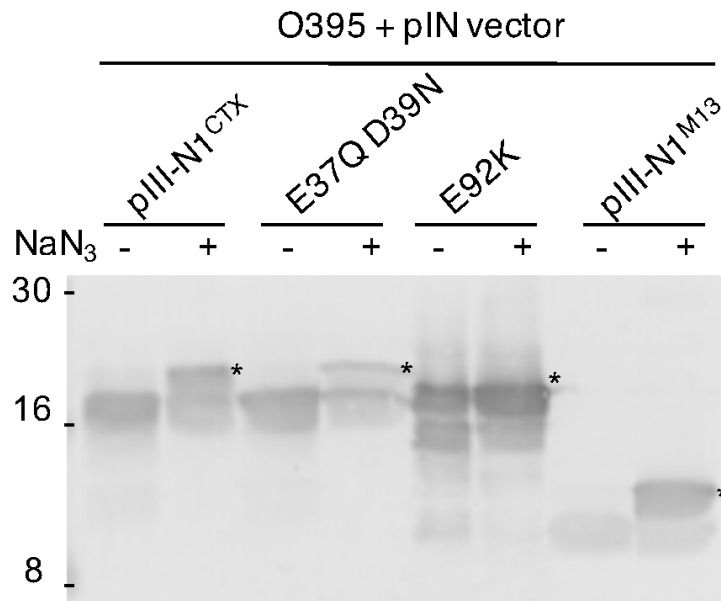

**Fig. S2 : Expression and periplasmic transport of the pIII-N1 His-tagged constructs and point mutants of interest.** *V. cholerae* O395 cells carrying pIN-pIII-N1<sup>CTX</sup>, pIN-pIII-N1<sup>CTX</sup> (E37Q D39N), pIN-pIII-N1<sup>CTX</sup> (E92K) or pIN-pIII-N1<sup>M13</sup> were grown to OD=0.3 in LB supplemented with MgCl<sub>2</sub>, then incubated either with (+) or without (-) sodium azide (NaN<sub>3</sub> 1 mM) for 30 min at room temperature. Then, plasmid expression was induced by adding IPTG (100 μM) and incubating the cultures at 37°C for 2 hrs. A total of approximately 0.2 OD units of whole cell lysate were loaded on a 15% acrylamide gel SDS-PAGE and immunodetected using anti-His monoclonal antibody. The molecular weight markers (in kDa) are indicated on the left. Stars indicate the higher molecular weight bands corresponding to protein precursors that accumulate in the cytoplasm when the sec pathway is inhibited by NaN<sub>3</sub>.

### Supplemental data 3

#### Vibrio cholerae isolate

O395  
1587  
2012EL-1759  
2740-80  
2740-80  
4260B  
623-39  
AM-19226  
B33  
BJG-01  
BX 330286  
C6706  
CP1030(3)  
CP1032(5)  
CP1033(6)  
CP1037(10)  
CP1038(11)  
CP1040(13)  
CP1041(14)  
CP1042(15)  
CP1044(17)  
CP1046(19)  
CP1047(20)  
CP1048(21)  
CP1050(23)  
HC-02A1  
HC-02C1  
HC-06A1  
HC-17A1  
HC-17A2  
HC-19A1  
HC-1A2  
HC-20A2  
HC-21A1  
HC-22A1  
HC-23A1  
HC-28A1  
HC-32A1  
HC-33A2  
HC-36A1  
HC-37A1  
HC-38A1  
HC-39A1  
HC-40A1  
HC-41A1  
HC-42A1  
HC-43A1  
HC-43B1  
HC-46A1  
HC-47A1  
HC-48A1  
HC-48B2  
HC-49A2  
HC-50A1  
HC-50A2  
HC-51A1  
HC-52A1  
HC-55A1  
HC-55B2  
HC-55C2  
HC-56A1  
HC-56A2  
HC-57A1  
HC-57A2  
HC-59A1  
HC-59B1

#### TolA protein ID

AAG17041.1 TolA [Vibrio cholerae]  
KNH58248.1 TolA protein [Vibrio cholerae]  
KEH04570.1 TolA [Vibrio cholerae]  
KNA61815.1 TolA protein [Vibrio cholerae]  
ANR87163.1 protein TolA [Vibrio cholerae]  
ELP50441.1 TolA protein [Vibrio cholerae]  
KNH55594.1 TolA protein [Vibrio cholerae]  
KNA56762.1 TolA protein [Vibrio cholerae]  
EEO16601.1 TolA protein [Vibrio cholerae]  
EGS68611.1 protein TolA [Vibrio cholerae]  
EEO20492.1 TolA protein [Vibrio cholerae]  
OFJ22580.1 protein TolA [Vibrio cholerae]  
EJH83233.1 protein TolA [Vibrio cholerae]  
EJH27184.1 protein TolA [Vibrio cholerae]  
EKK81010.1 protein TolA [Vibrio cholerae]  
EKG68196.1 protein TolA [Vibrio cholerae]  
EJH29429.1 protein TolA [Vibrio cholerae]  
EKG69121.1 protein TolA [Vibrio cholerae]  
EJH28074.1 protein TolA [Vibrio cholerae]  
EJH38367.1 protein TolA [Vibrio cholerae]  
EKG78113.1 protein TolA [Vibrio cholerae]  
EJH39131.1 protein TolA [Vibrio cholerae]  
EJH85493.1 protein TolA [Vibrio cholerae]  
EJH42408.1 protein TolA [Vibrio cholerae]  
EKG79384.1 protein TolA [Vibrio cholerae]  
EGS61263.1 protein TolA [Vibrio cholerae]  
EKL92294.1 protein TolA [Vibrio cholerae]  
EHH71180.1 protein TolA [Vibrio cholerae]  
EKK96962.1 protein TolA [Vibrio cholerae]  
EKL86114.1 protein TolA [Vibrio cholerae]  
EHH76472.1 protein TolA [Vibrio cholerae]  
EKK93092.1 protein TolA [Vibrio cholerae]  
EJH49963.1 protein TolA [Vibrio cholerae]  
EHH72034.1 protein TolA [Vibrio cholerae]  
EHH81683.1 protein TolA [Vibrio cholerae]  
EHH83325.1 protein TolA [Vibrio cholerae]  
EHH86659.1 protein TolA [Vibrio cholerae]  
EHH93028.1 protein TolA [Vibrio cholerae]  
EHH98450.1 protein TolA [Vibrio cholerae]  
ERP67718.1 protein TolA [Vibrio cholerae]  
EKL85345.1 protein TolA [Vibrio cholerae]  
EGS70402.1 protein TolA [Vibrio cholerae]  
EKG45469.1 protein TolA [Vibrio cholerae]  
EGS48190.1 protein TolA [Vibrio cholerae]  
EKG51082.1 protein TolA [Vibrio cholerae]  
EJH72841.1 protein TolA [Vibrio cholerae]  
EHH97458.1 protein TolA [Vibrio cholerae]  
EJH51131.1 protein TolA [Vibrio cholerae]  
EJH53444.1 protein TolA [Vibrio cholerae]  
EJH80761.1 protein TolA [Vibrio cholerae]  
EGS47519.1 protein TolA [Vibrio cholerae]  
EHI03882.1 protein TolA [Vibrio cholerae]  
EGQ97343.1 protein TolA [Vibrio cholerae]  
EKG50642.1 protein TolA [Vibrio cholerae]  
EKL06240.1 protein TolA [Vibrio cholerae]  
EKG90430.1 protein TolA [Vibrio cholerae]  
EKG55816.1 protein TolA [Vibrio cholerae]  
EKG61388.1 protein TolA [Vibrio cholerae]  
EKL99738.1 protein TolA [Vibrio cholerae]  
EKL06804.1 protein TolA [Vibrio cholerae]  
EKG60702.1 protein TolA [Vibrio cholerae]  
EJH69589.1 protein TolA [Vibrio cholerae]  
EKG69728.1 protein TolA [Vibrio cholerae]  
EJH70213.1 protein TolA [Vibrio cholerae]  
EKL12669.1 protein TolA [Vibrio cholerae]  
EKM06391.1 protein TolA [Vibrio cholerae]

|                              |            |              |      |                   |
|------------------------------|------------|--------------|------|-------------------|
| HC-60A1                      | EKL12763.1 | protein      | TolA | [Vibrio cholerae] |
| HC-61A1                      | EHT05342.1 | protein      | TolA | [Vibrio cholerae] |
| HC-61A2                      | EKL20125.1 | protein      | TolA | [Vibrio cholerae] |
| HC-62A1                      | EKL26204.1 | protein      | TolA | [Vibrio cholerae] |
| HC-62B1                      | EKM09587.1 | protein      | TolA | [Vibrio cholerae] |
| HC-64A1                      | ELS73696.1 | protein      | TolA | [Vibrio cholerae] |
| HC-65A1                      | ELS81445.1 | protein      | TolA | [Vibrio cholerae] |
| HC-67A1                      | ELS88637.1 | protein      | TolA | [Vibrio cholerae] |
| HC-68A1                      | ELS96209.1 | protein      | TolA | [Vibrio cholerae] |
| HC-69A1                      | EKM17783.1 | protein      | TolA | [Vibrio cholerae] |
| HC-70A1                      | EGS47438.1 | protein      | TolA | [Vibrio cholerae] |
| HC-71A1                      | ELT03739.1 | protein      | TolA | [Vibrio cholerae] |
| HC-72A2                      | ELT09806.1 | protein      | TolA | [Vibrio cholerae] |
| HC-77A1                      | EKL25291.1 | protein      | TolA | [Vibrio cholerae] |
| HC-78A1                      | ELT17500.1 | protein      | TolA | [Vibrio cholerae] |
| HC-7A1                       | ELT24567.1 | protein      | TolA | [Vibrio cholerae] |
| HC-80A1                      | ELT32189.1 | protein      | TolA | [Vibrio cholerae] |
| HC-81A1                      | ELT39883.1 | protein      | TolA | [Vibrio cholerae] |
| HC-81A2                      | EKG88838.1 | protein      | TolA | [Vibrio cholerae] |
| HCUF01                       | EGQ98317.1 | protein      | TolA | [Vibrio cholerae] |
| HE-25                        | EJH62632.1 | protein      | TolA | [Vibrio cholerae] |
| HFU-02                       | EGS62215.1 | protein      | TolA | [Vibrio cholerae] |
| IRS 101                      | EET92627.1 | TolA protein |      | [Vibrio cholerae] |
| M66-2                        | ACP06066.1 | tolA protein |      | [Vibrio cholerae] |
| MAK 757                      | EFH78507.1 | TolA         |      | [Vibrio cholerae] |
| MJ-1236                      | ACQ60705.1 | TolA protein |      | [Vibrio cholerae] |
| MO10                         | EET23042.1 | tolA protein |      | [Vibrio cholerae] |
| MS6                          | BAP03257.1 | TolA protein |      | [Vibrio cholerae] |
| MZO-3                        | KNA50641.1 | TolA protein |      | [Vibrio cholerae] |
| O1 biovar El tor Str. L-3226 | EYC49350.1 | TolA         |      | [Vibrio cholerae] |
| O1 biovar El Tor str. N16961 | AAF94985.1 | tolA protein |      | [Vibrio cholerae] |
| O1 str. 116059               | EMP83962.1 | protein      | TolA | [Vibrio cholerae] |
| O1 str. 2010EL-1786          | AET26930.1 | TolA protein |      | [Vibrio cholerae] |
| O1 str. 95412                | EMP97232.1 | protein      | TolA | [Vibrio cholerae] |
| O1 str. AG-7404              | EMP95143.1 | protein      | TolA | [Vibrio cholerae] |
| O1 str. AG-8040              | EMQ02788.1 | protein      | TolA | [Vibrio cholerae] |
| O1 str. EC-0009              | EMQ04249.1 | protein      | TolA | [Vibrio cholerae] |
| O1 str. EC-0012              | EMQ11023.1 | protein      | TolA | [Vibrio cholerae] |
| O1 str. EC-0027              | EMQ10848.1 | protein      | TolA | [Vibrio cholerae] |
| O1 str. EC-0051              | EMQ15676.1 | protein      | TolA | [Vibrio cholerae] |
| O1 str. EDC-020              | EMQ21633.1 | protein      | TolA | [Vibrio cholerae] |
| O1 str. EDC-022              | EMQ26604.1 | protein      | TolA | [Vibrio cholerae] |
| O1 str. EM-1536              | EMQ25667.1 | protein      | TolA | [Vibrio cholerae] |
| O1 str. EM-1546              | EMQ31601.1 | protein      | TolA | [Vibrio cholerae] |
| O1 str. EM-1626              | EMQ37289.1 | protein      | TolA | [Vibrio cholerae] |
| O1 str. EM-1676A             | EMQ51732.1 | protein      | TolA | [Vibrio cholerae] |
| O1 str. EM-1727              | EMQ50741.1 | protein      | TolA | [Vibrio cholerae] |
| O1 str. Inaba G4222          | EMB02008.1 | TolA protein |      | [Vibrio cholerae] |
| O1 str. Nep-21106            | EMQ62444.1 | protein      | TolA | [Vibrio cholerae] |
| O1 str. Nep-21113            | EMQ42466.1 | protein      | TolA | [Vibrio cholerae] |
| O1 str. NHCC-004A            | EMQ53021.1 | protein      | TolA | [Vibrio cholerae] |
| O1 str. NHCC-006C            | EMQ38536.1 | protein      | TolA | [Vibrio cholerae] |
| O1 str. NHCC-008D            | EMQ65782.1 | protein      | TolA | [Vibrio cholerae] |
| O1 str. NHCC-010F            | EMQ67729.1 | protein      | TolA | [Vibrio cholerae] |
| O1 str. PCS-022              | EWM32085.1 | protein      | TolA | [Vibrio cholerae] |
| O1 str. PCS-023              | EMQ47243.1 | protein      | TolA | [Vibrio cholerae] |
| PS15                         | EKY33057.1 | TolA protein |      | [Vibrio cholerae] |
| RC385                        | EFH75783.1 | tolA protein |      | [Vibrio cholerae] |
| RC9                          | EEO08498.1 | TolA protein |      | [Vibrio cholerae] |
| TMA 21                       | EEO12881.1 | TolA protein |      | [Vibrio cholerae] |
| V51                          | KNA58939.1 | TolA protein |      | [Vibrio cholerae] |
| V52                          | KNH50562.1 | TolA protein |      | [Vibrio cholerae] |

**Fig. S3 : List of *Vibrio cholerae* isolate genomes used to study TolA sequence conservation.** The TolA protein sequences retrieved from the listed 128 *Vibrio cholerae* isolates present 100% identity.

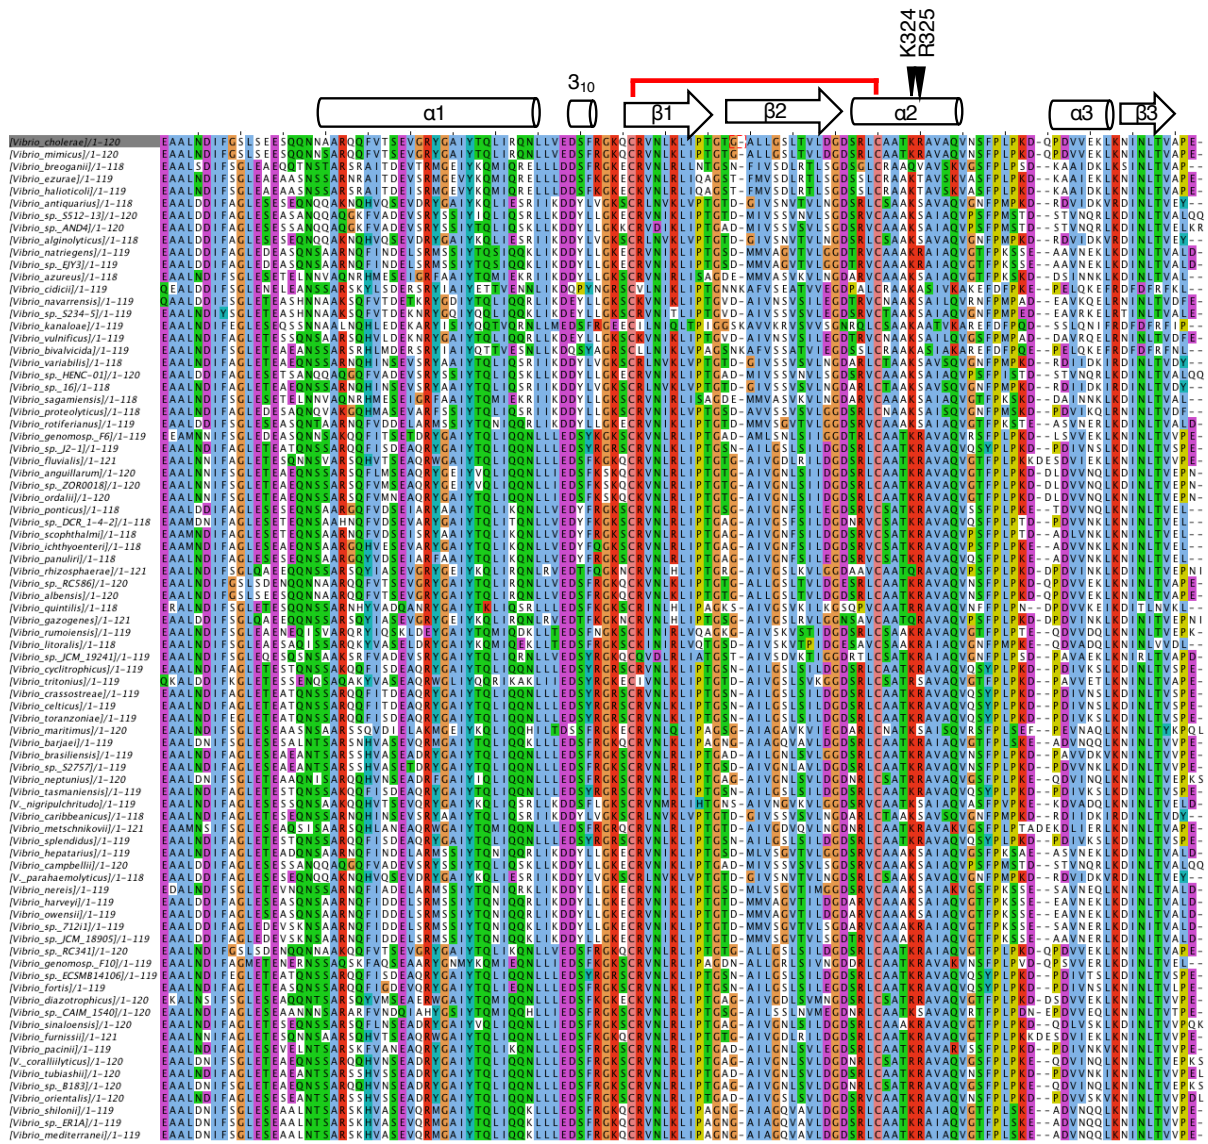

**Fig. S4: Multiple TolAIII domain sequence alignment of representative members of the gammaproteobacteria family Vibrionaceae genus *Vibrio*.** The depicted secondary-structure elements correspond to the crystal structure of *V. cholerae* TolAIII (PDB: 4G7X) with  $\beta$ -strands as arrows and  $\alpha$ -helices as a cylinders. Positions are colored according to the Clustal color scheme: cysteines in pink, glycines in orange and prolines in yellow; other positions are colored according to conservation of chemical properties: hydrophobic in blue, aromatic in cyan, polar negative in purple, polar positive in red, and polar neutral in green.

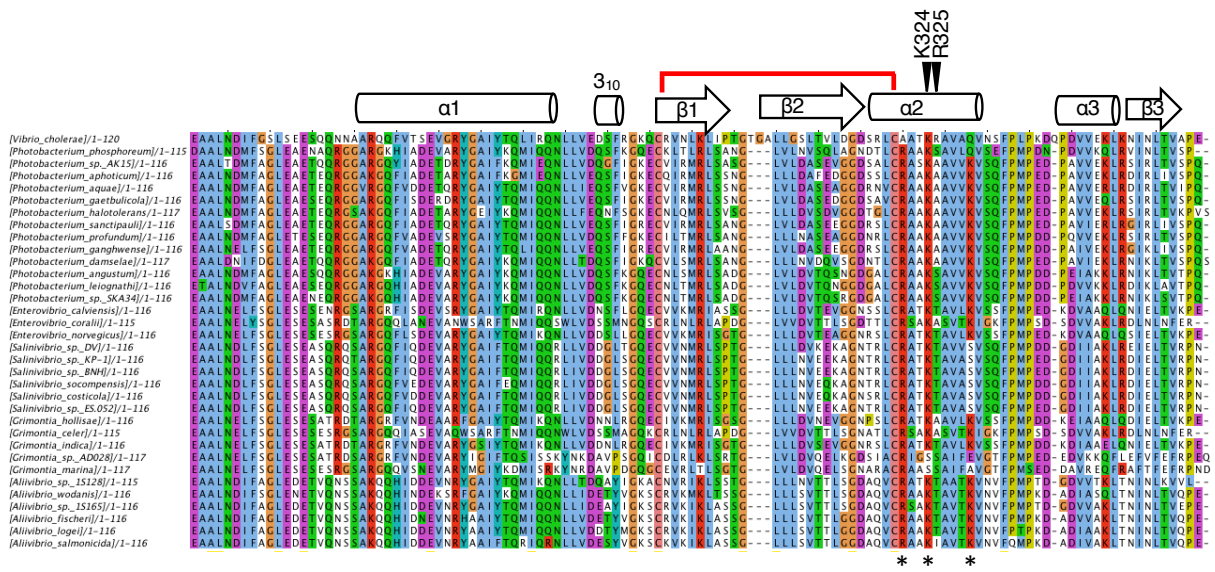

**Fig. S5: Multiple TolAIII domain sequence alignment of representative members of the gammaproteobacteria family Vibrionaceae.** The depicted secondary-structure elements correspond to the crystal structure of *V. cholerae* TolAIII (PDB: 4G7X) with  $\beta$ -strands as arrows and  $\alpha$ -helices as a cylinders. Positions are colored according to the Clustal color scheme: cysteines in pink, glycines in orange and prolines in yellow; other positions are colored according to conservation of chemical properties: hydrophobic in blue, aromatic in cyan, polar negative in purple, polar positive in red, and polar neutral in green. Stars indicate the positive charged residues present on the same side of the  $\alpha 2$ -helix.

|     | Atom<br>no. | Atom<br>name | Res<br>name | Res<br>no. | Chain |      | Atom<br>no. | Res<br>name | Res<br>name | Res<br>no. | Chain |
|-----|-------------|--------------|-------------|------------|-------|------|-------------|-------------|-------------|------------|-------|
| 1.  | 102         | O            | THR         | 10         | A     | <--> | 2257        | O           | LEU         | 310        | B     |
| 2.  | 102         | O            | THR         | 10         | A     | <--> | 2278        | CG2         | THR         | 311        | B     |
| 3.  | 102         | O            | THR         | 10         | A     | <--> | 2275        | C           | THR         | 311        | B     |
| 4.  | 102         | O            | THR         | 10         | A     | <--> | 2274        | CA          | THR         | 311        | B     |
| 5.  | 105         | OG1          | THR         | 10         | A     | <--> | 2278        | CG2         | THR         | 311        | B     |
| 6.  | 102         | O            | THR         | 10         | A     | <--> | 2287        | N           | VAL         | 312        | B     |
| 7.  | 105         | OG1          | THR         | 10         | A     | <--> | 2290        | O           | VAL         | 312        | B     |
| 8.  | 103         | CB           | THR         | 10         | A     | <--> | 2290        | O           | VAL         | 312        | B     |
| 9.  | 104         | CG2          | THR         | 10         | A     | <--> | 2290        | O           | VAL         | 312        | B     |
| 10. | 118         | CG2          | THR         | 11         | A     | <--> | 2246        | CB          | SER         | 309        | B     |
| 11. | 115         | C            | THR         | 11         | A     | <--> | 2257        | O           | LEU         | 310        | B     |
| 12. | 118         | CG2          | THR         | 11         | A     | <--> | 2257        | O           | LEU         | 310        | B     |
| 13. | 114         | CA           | THR         | 11         | A     | <--> | 2257        | O           | LEU         | 310        | B     |
| 14. | 119         | OG1          | THR         | 11         | A     | <--> | 2279        | OG1         | THR         | 311        | B     |
| 15. | 119         | OG1          | THR         | 11         | A     | <--> | 2278        | CG2         | THR         | 311        | B     |
| 16. | 119         | OG1          | THR         | 11         | A     | <--> | 2277        | CB          | THR         | 311        | B     |
| 17. | 118         | CG2          | THR         | 11         | A     | <--> | 2279        | OG1         | THR         | 311        | B     |
| 18. | 117         | CB           | THR         | 11         | A     | <--> | 2279        | OG1         | THR         | 311        | B     |
| 19. | 114         | CA           | THR         | 11         | A     | <--> | 2279        | OG1         | THR         | 311        | B     |
| 20. | 130         | O            | SER         | 12         | A     | <--> | 2246        | CB          | SER         | 309        | B     |
| 21. | 130         | O            | SER         | 12         | A     | <--> | 2243        | CA          | SER         | 309        | B     |
| 22. | 130         | O            | SER         | 12         | A     | <--> | 2244        | C           | SER         | 309        | B     |
| 23. | 130         | O            | SER         | 12         | A     | <--> | 2257        | O           | LEU         | 310        | B     |
| 24. | 130         | O            | SER         | 12         | A     | <--> | 2254        | N           | LEU         | 310        | B     |
| 25. | 131         | CB           | SER         | 12         | A     | <--> | 2257        | O           | LEU         | 310        | B     |
| 26. | 128         | CA           | SER         | 12         | A     | <--> | 2257        | O           | LEU         | 310        | B     |
| 27. | 127         | N            | SER         | 12         | A     | <--> | 2257        | O           | LEU         | 310        | B     |
| 28. | 127         | N            | SER         | 12         | A     | <--> | 2256        | C           | LEU         | 310        | B     |
| 29. | 132         | OG           | SER         | 12         | A     | <--> | 2463        | NZ          | LYS         | 324        | B     |
| 30. | 132         | OG           | SER         | 12         | A     | <--> | 2462        | CE          | LYS         | 324        | B     |
| 31. | 140         | C            | HIS         | 13         | A     | <--> | 2238        | O           | GLY         | 308        | B     |
| 32. | 139         | CA           | HIS         | 13         | A     | <--> | 2238        | O           | GLY         | 308        | B     |
| 33. | 163         | OE1          | GLN         | 14         | A     | <--> | 2220        | CB          | LEU         | 307        | B     |
| 34. | 163         | OE1          | GLN         | 14         | A     | <--> | 2223        | CD2         | LEU         | 307        | B     |
| 35. | 162         | NE2          | GLN         | 14         | A     | <--> | 2220        | CB          | LEU         | 307        | B     |
| 36. | 161         | CD           | GLN         | 14         | A     | <--> | 2220        | CB          | LEU         | 307        | B     |
| 37. | 162         | NE2          | GLN         | 14         | A     | <--> | 2219        | O           | LEU         | 307        | B     |
| 38. | 161         | CD           | GLN         | 14         | A     | <--> | 2219        | O           | LEU         | 307        | B     |
| 39. | 160         | CG           | GLN         | 14         | A     | <--> | 2219        | O           | LEU         | 307        | B     |
| 40. | 162         | NE2          | GLN         | 14         | A     | <--> | 2216        | N           | LEU         | 307        | B     |
| 41. | 159         | CB           | GLN         | 14         | A     | <--> | 2223        | CD2         | LEU         | 307        | B     |
| 42. | 159         | CB           | GLN         | 14         | A     | <--> | 2219        | O           | LEU         | 307        | B     |
| 43. | 159         | CB           | GLN         | 14         | A     | <--> | 2238        | O           | GLY         | 308        | B     |
| 44. | 155         | N            | GLN         | 14         | A     | <--> | 2237        | C           | GLY         | 308        | B     |
| 45. | 155         | N            | GLN         | 14         | A     | <--> | 2238        | O           | GLY         | 308        | B     |
| 46. | 158         | O            | GLN         | 14         | A     | <--> | 2238        | O           | GLY         | 308        | B     |
| 47. | 156         | CA           | GLN         | 14         | A     | <--> | 2238        | O           | GLY         | 308        | B     |
| 48. | 510         | OE1          | GLU         | 37         | A     | <--> | 2463        | NZ          | LYS         | 324        | B     |
| 49. | 510         | OE1          | GLU         | 37         | A     | <--> | 2462        | CE          | LYS         | 324        | B     |
| 50. | 509         | CD           | GLU         | 37         | A     | <--> | 2463        | NZ          | LYS         | 324        | B     |
| 51. | 547         | OD2          | ASP         | 39         | A     | <--> | 2481        | CB          | ARG         | 325        | B     |



|     |      |     |     |    |   |      |      |     |     |     |   |
|-----|------|-----|-----|----|---|------|------|-----|-----|-----|---|
| 52. | 547  | OD2 | ASP | 39 | A | <--> | 2486 | NH1 | ARG | 325 | B |
| 53. | 547  | OD2 | ASP | 39 | A | <--> | 2485 | CZ  | ARG | 325 | B |
| 54. | 547  | OD2 | ASP | 39 | A | <--> | 2484 | NE  | ARG | 325 | B |
| 55. | 547  | OD2 | ASP | 39 | A | <--> | 2483 | CD  | ARG | 325 | B |
| 56. | 546  | OD1 | ASP | 39 | A | <--> | 2486 | NH1 | ARG | 325 | B |
| 57. | 546  | OD1 | ASP | 39 | A | <--> | 2485 | CZ  | ARG | 325 | B |
| 58. | 546  | OD1 | ASP | 39 | A | <--> | 2484 | NE  | ARG | 325 | B |
| 59. | 545  | CG  | ASP | 39 | A | <--> | 2486 | NH1 | ARG | 325 | B |
| 60. | 545  | CG  | ASP | 39 | A | <--> | 2485 | CZ  | ARG | 325 | B |
| 61. | 545  | CG  | ASP | 39 | A | <--> | 2484 | NE  | ARG | 325 | B |
| 62. | 568  | CB  | TYR | 41 | A | <--> | 2485 | CZ  | ARG | 325 | B |
| 63. | 568  | CB  | TYR | 41 | A | <--> | 2487 | NH2 | ARG | 325 | B |
| 64. | 587  | C   | GLY | 42 | A | <--> | 2486 | NH1 | ARG | 325 | B |
| 65. | 588  | O   | GLY | 42 | A | <--> | 2486 | NH1 | ARG | 325 | B |
| 66. | 595  | O   | PHE | 43 | A | <--> | 2486 | NH1 | ARG | 325 | B |
| 67. | 594  | C   | PHE | 43 | A | <--> | 2486 | NH1 | ARG | 325 | B |
| 68. | 613  | CA  | VAL | 44 | A | <--> | 2486 | NH1 | ARG | 325 | B |
| 69. | 618  | CG2 | VAL | 44 | A | <--> | 2486 | NH1 | ARG | 325 | B |
| 70. | 612  | N   | VAL | 44 | A | <--> | 2486 | NH1 | ARG | 325 | B |
| 71. | 617  | CG1 | VAL | 44 | A | <--> | 2531 | CB  | ALA | 328 | B |
| 72. | 681  | CD2 | LEU | 48 | A | <--> | 2577 | OD1 | ASN | 331 | B |
| 73. | 739  | ND2 | ASN | 52 | A | <--> | 2150 | CG2 | THR | 301 | B |
| 74. | 740  | OD1 | ASN | 52 | A | <--> | 2204 | CD2 | LEU | 306 | B |
| 75. | 777  | OH  | TYR | 55 | A | <--> | 2573 | O   | ASN | 331 | B |
| 76. | 805  | NZ  | LYS | 57 | A | <--> | 2530 | O   | ALA | 328 | B |
| 77. | 805  | NZ  | LYS | 57 | A | <--> | 2529 | C   | ALA | 328 | B |
| 78. | 804  | CE  | LYS | 57 | A | <--> | 2530 | O   | ALA | 328 | B |
| 79. | 805  | NZ  | LYS | 57 | A | <--> | 2556 | C   | VAL | 330 | B |
| 80. | 805  | NZ  | LYS | 57 | A | <--> | 2557 | O   | VAL | 330 | B |
| 81. | 834  | CD2 | LEU | 59 | A | <--> | 2223 | CD2 | LEU | 307 | B |
| 82. | 833  | CD1 | LEU | 59 | A | <--> | 2458 | O   | LYS | 324 | B |
| 83. | 833  | CD1 | LEU | 59 | A | <--> | 2531 | CB  | ALA | 328 | B |
| 84. | 832  | CG  | LEU | 59 | A | <--> | 2531 | CB  | ALA | 328 | B |
| 85. | 1344 | OE1 | GLU | 92 | A | <--> | 2823 | CE  | LYS | 347 | B |
| 86. | 1344 | OE1 | GLU | 92 | A | <--> | 2824 | NZ  | LYS | 347 | B |
| 87. | 1342 | CG  | GLU | 92 | A | <--> | 2824 | NZ  | LYS | 347 | B |
| 88. | 1343 | CD  | GLU | 92 | A | <--> | 2824 | NZ  | LYS | 347 | B |

**Fig. S6 : Analysis of the TolAIII<sup>Vc</sup>/pIII-N1<sup>CTX</sup> complex interface using the open access tool 2P2I inspector.** The following parameters were applied : two atoms are considered to be in contact across the interface if they are at a distance smaller than 4 Å. Non-bonded contacts between pIII-N1<sup>CTX</sup> (Chain A) and TolAIII<sup>Vc</sup> (Chain B) atoms are listed. Contacts engaged by TolAIII residue K324 are colored in red and residue R325 are colored in green.

**Table S1 : Strains and plasmids used in the study.**

| <b>Strains and plasmids</b>                     | <b>Genotype or description</b>                                                                                                                                                                                                                                                                                                         | <b>Source/References</b>           |
|-------------------------------------------------|----------------------------------------------------------------------------------------------------------------------------------------------------------------------------------------------------------------------------------------------------------------------------------------------------------------------------------------|------------------------------------|
| <i>E. coli</i>                                  |                                                                                                                                                                                                                                                                                                                                        |                                    |
| DH5α                                            | F- Φ80/ <i>lacZ</i> ΔM15 Δ( <i>lacZYA-argF</i> ) U169 <i>recA1 endA1 hsdR17</i> (rK-, mK+) <i>phoA supE44 λ- thi-1 gyrA96 relA1</i>                                                                                                                                                                                                    | Laboratory collection              |
| CC118λpir                                       | Δ( <i>ara-leu</i> ), <i>araD</i> , Δ <i>lacX74</i> , <i>galE</i> , <i>galK</i> , <i>phoA20</i> , <i>thi-1</i> , <i>rpsE</i> , <i>rpoB</i> , <i>argE</i> (Am), <i>recA</i> , λpir phage lysogen                                                                                                                                         | Laboratory collection              |
| SM10λpir                                        | KmR, <i>thi-1</i> , <i>thr</i> , <i>leu</i> , <i>tonA</i> , <i>lacY</i> , <i>supE</i> , <i>recA::RP4-2-Tc::Mu</i> , <i>pir</i>                                                                                                                                                                                                         | Laboratory collection              |
| BTH101                                          | F-, <i>cya-99</i> , <i>araD139</i> , <i>galE15</i> , <i>galK16</i> , <i>rpsL1</i> (Str <sup>R</sup> ), <i>hsdR2</i> , <i>mcrA1</i> , <i>mcrB1</i> .                                                                                                                                                                                    | Ref. (29)                          |
| SHuffle T7                                      | F' <i>lac</i> , <i>pro</i> , <i>lacI<sup>Q</sup></i> / Δ( <i>ara-leu</i> )7697 <i>araD139 fhuA2 lacZ::T7 gene1</i> Δ( <i>phoA</i> ) <i>PvuII phoR ahpC* galE</i> (or <i>U galK</i> <i>λatt::pNEB3-r1-cDsbC</i> (Spec <sup>R</sup> , <i>lacI<sup>Q</sup></i> ) Δ <i>trxB rpsL150</i> (Str <sup>R</sup> ) Δ <i>gor</i> Δ( <i>malF</i> )3 | NEB                                |
| Oxi-BTH                                         | SHuffle T7 <i>cya</i> <sup>o</sup>                                                                                                                                                                                                                                                                                                     | This study                         |
| W3110                                           | F- lambda- IN(rrnD-rrnE)1 <i>rph-1</i>                                                                                                                                                                                                                                                                                                 | Laboratory collection              |
| <i>V. cholerae</i>                              |                                                                                                                                                                                                                                                                                                                                        |                                    |
| O395                                            | O1 classical Ogawa; SmR                                                                                                                                                                                                                                                                                                                | Gift from Dr. FX. Barre            |
| O395 <i>tolA</i> Δ(41-421)                      | O395 bearing a deletion of <i>tolA</i> sequence, resulting in a protein missing amino acid 41 to 421; SmR ApR                                                                                                                                                                                                                          | This study                         |
| N16961                                          | O1 El Tor; SmR                                                                                                                                                                                                                                                                                                                         | Gift from Dr. FX. Barre            |
| BS2 pCTX-cm                                     | N16961 <i>dif1</i> - carrying the replicative form of CTX-Cm phage; SmR CmR                                                                                                                                                                                                                                                            | Ref. (71)                          |
| <i>V. anguillarum</i>                           | ATCC19264                                                                                                                                                                                                                                                                                                                              | Gift from Dr. D. Destoumieux-Gazon |
| <i>V. fischeri</i>                              | ES114                                                                                                                                                                                                                                                                                                                                  | Gift from Dr. MS. Aschtgen         |
| <i>V. harveyi</i>                               | LMG11659                                                                                                                                                                                                                                                                                                                               | Gift from Dr. MS. Aschtgen         |
| <i>V. tasmaniensis</i>                          | LMG20012T                                                                                                                                                                                                                                                                                                                              | Gift from Dr. D. Destoumieux-Gazon |
| <i>V. alginolyticus</i>                         | ATCC 17749                                                                                                                                                                                                                                                                                                                             | Gift from Dr. LF. Wu               |
| <b>Plasmids used in rescue experiments</b>      |                                                                                                                                                                                                                                                                                                                                        |                                    |
| pBAD18km                                        | Arabinose-inducible plasmid, KanR                                                                                                                                                                                                                                                                                                      | Ref. (70)                          |
| pBAD- <i>tolA</i> <sup>Vc</sup>                 | pBAD18km carrying a consensus SD and <i>V. cholerae tolA</i> gene, KmR                                                                                                                                                                                                                                                                 | This study                         |
| pBAD- <i>tolA</i> <sup>Vc</sup> (K324E)         | pBAD- <i>tolA</i> <sup>Vc</sup> bearing a K-to-E substitution at position 324, KmR                                                                                                                                                                                                                                                     | This study                         |
| pBAD- <i>tolA</i> <sup>Vc</sup> (R325D)         | pBAD- <i>tolA</i> <sup>Vc</sup> bearing a R-to-D substitution at position 325, KmR                                                                                                                                                                                                                                                     | This study                         |
| pBAD- <i>tolA</i> <sup>Vc</sup> (K324E-R325D)   | pBAD- <i>tolA</i> <sup>Vc</sup> bearing K324E and R325D substitutions, KmR                                                                                                                                                                                                                                                             | This study                         |
| pBAD- <i>tolA</i> <sup>Vc</sup> (K347E)         | pBAD- <i>tolA</i> <sup>Vc</sup> bearing a K-to-E substitution at position 347, KmR                                                                                                                                                                                                                                                     | This study                         |
| <b>Plasmids used for periplasmic expression</b> |                                                                                                                                                                                                                                                                                                                                        |                                    |
| pIN                                             | pIN-III-ompA2 vector, <i>ompA</i> signal sequence followed by a multi cloning site, ApR                                                                                                                                                                                                                                                | Laboratory collection              |
| pIN-pIII-N1 <sup>CTX</sup>                      | pIN vector carrying fragment of CTX PIII encoding gene (residues 15 to 138), N-terminal Strep Tag epitope, C-terminal 6-His epitope, ApR                                                                                                                                                                                               | This study                         |
| pIN-pIII-N1 <sup>CTX</sup> (E37Q-D39N)          | pIN-pIII-N1 <sup>CTX</sup> bearing a E-to-Q mutation at position 37 and D-to-N mutation at position 39, ApR                                                                                                                                                                                                                            | This study                         |
| pIN-pIII-N1 <sup>CTX</sup> (E92K)               | pIN-pIII-N1 <sup>CTX</sup> bearing a E-to-K mutation at position 92, ApR                                                                                                                                                                                                                                                               | This study                         |
| pIN-pIII-N1 <sup>CTX</sup> (C32S)               | pIN-pIII-N1 <sup>CTX</sup> bearing a C-to-S mutation at position 32, ApR                                                                                                                                                                                                                                                               | This study                         |

|                                                        |                                                                                                                                |                           |
|--------------------------------------------------------|--------------------------------------------------------------------------------------------------------------------------------|---------------------------|
| pIN-pIII-N1 <sup>CTX</sup> (C47S)                      | pIN-PIII-N1CTX bearing a C-to-S mutation at position 47, ApR                                                                   | This study                |
| pIN-pIII-N1 <sup>CTX</sup> (C75S)                      | pIN-PIII-N1CTX bearing a C-to-S mutation at position 75, ApR                                                                   | This study                |
| pIN-pIII-N1 <sup>CTX</sup> (C96S)                      | pIN-PIII-N1CTX bearing C-to-S mutation at position 96, ApR                                                                     | This study                |
| pIN-pIII-N1 <sup>M13</sup>                             | pINIII-ompA2 vector carrying a fragment of M13 PIII encoding gene, N-terminal Strep Tag epitope, C-terminal 6-His epitope, ApR | Ref. (10)                 |
| <b>Plasmids used in Bacterial 2-hybrid experiments</b> |                                                                                                                                |                           |
| pUT18c                                                 | BACTH expression vector, ApR                                                                                                   | Ref. (29)                 |
| pUT18-TolAIII <sup>Ec</sup>                            | <i>E. coli tolA</i> sequence (residues 292 to 421) cloned downstream T18 into pUT18c, ApR                                      | This study                |
| pUT18-TolAIII <sup>Vc</sup>                            | <i>V. cholerae tolA</i> sequence (residues 239 to 356) cloned downstream T18 into pUT18c, ApR                                  | This study                |
| pUT18-TolAIII <sup>Vc</sup> (C292S)                    | pUT18-TolA3Vc bearing a C-to-S mutation at position 292                                                                        | This study                |
| pUT18-TolAIII <sup>Vc</sup> (K324E-R325D)              | pUT18-TolA3Vc bearing K-to-E and R-to-D mutations at positions 324 and 325, respectively                                       | This study                |
| pUT18-TolAIII <sup>Vc</sup> (K324E)                    | pUT18-TolA3Vc bearing K-to-E mutations at positions 324                                                                        | This study                |
| pUT18-TolAIII <sup>Vc</sup> (R325D)                    | pUT18-TolA3Vc bearing R-to-D mutations at positions 325                                                                        | This study                |
| pUT18-TolAIII <sup>Vc</sup> (K347E)                    | pUT18-TolA3Vc bearing a K-to-E mutation at position 347                                                                        | This study                |
| pUT18-TolAIII <i>V. alginolyticus</i>                  | <i>V. alginolyticus tolA</i> sequence (residues 239 to 356) cloned downstream T18 into pUT18c, ApR                             | This study                |
| pUT18-TolAIII <i>V. anguillarum</i>                    | <i>V. anguillarum tolA</i> sequence (residues 239 to 356) cloned downstream T18 into pUT18c, ApR                               | This study                |
| pUT18-TolAIII <i>V. fischeri</i>                       | <i>V. fischeri tolA</i> sequence (residues 233 to 346) cloned downstream T18 into pUT18c, ApR                                  | This study                |
| pUT18-TolAIII <i>V. tasmaniensis</i>                   | <i>V. tasmaniensis tolA</i> sequence (residues 239 to 356) cloned downstream T18 into pUT18c, ApR                              | This study                |
| pUT18-TolAIII <i>V. harveyi</i>                        | <i>V. harveyi tolA</i> sequence (residues 239 to 356) cloned downstream T18 into pUT18c, ApR                                   | This study                |
| pKT25                                                  | BACTH expression vector, KmR                                                                                                   | Ref. (29)                 |
| pKT25-pIII-N1 <sup>M13</sup>                           | M13 pIII sequence (residues 20 to 89) cloned downstream T25 into pKT25                                                         | This study                |
| pKT25-pIII-N1 <sup>CTX</sup>                           | CTX pIII sequence (residues 15 to 136) cloned downstream T25 into pKT25                                                        | This study                |
| pKT25 pIII-N2 <sup>CTX</sup>                           | CTX pIII sequence (residues 130 to 266) cloned downstream T25 into pKT25                                                       | This study                |
| pKT25-pIII-N1N2 <sup>CTX</sup>                         | CTX pIII sequence (residues 15 to 266) cloned downstream T25 into pKT25                                                        | This study                |
| pKT25-colAN                                            | colicin A sequence (residues 1 to 178) cloned downstream T25 into pKT25                                                        | Gift from Dr. E. Bouveret |
| pKT25-pIII-N1 <sup>CTX</sup> (C32S)                    | pKT25-PIII-N1 <sup>CTX</sup> bearing a C-to-S mutation at position 32                                                          | This study                |
| pKT25-pIII-N1 <sup>CTX</sup> (C47S)                    | pKT25-PIII-N1 <sup>CTX</sup> bearing a C-to-S mutation at position 47                                                          | This study                |
| pKT25-pIII-N1 <sup>CTX</sup> (C75S)                    | pKT25-PIII-N1 <sup>CTX</sup> bearing a C-to-S mutation at position 85                                                          | This study                |
| pKT25-pIII-N1 <sup>CTX</sup> (C96S)                    | pKT25-PIII-N1 <sup>CTX</sup> bearing a C-to-S mutation at position 90                                                          | This study                |
| pKT25-pIII-N1 <sup>CTX</sup> (E37Q-D39N)               | pKT25-PIII-N1 <sup>CTX</sup> bearing E-to-Q and D-to-N mutations at position 37 and 39, respectively                           | This study                |
| pKT25-pIII-N1 <sup>CTX</sup> (E37K-D39R)               | pKT25-PIII-N1 <sup>CTX</sup> bearing E-to-K and D-to-R mutations at position 37 and 39, respectively                           | This study                |
| pKT25-pIII-N1 <sup>CTX</sup> (E92K)                    | pKT25-PIII-N1 <sup>CTX</sup> bearing a E-to-K mutation at position 92                                                          | This study                |

**Table S2 : Primers used in the study**

| PRIMERS                                 | NAME   | SEQUENCES                                                                        |
|-----------------------------------------|--------|----------------------------------------------------------------------------------|
| <b>BACTH experiments</b>                |        |                                                                                  |
| pUT18-TolAIII <sup>Vc</sup>             | oLH173 | GCAGTGGAACGCCACTGCAGGGCCTTGAATGATATTTTTGGC                                       |
|                                         | oLH174 | GATGAATTCGAGCTCGGTACCTCAGGTGCTACGGTTAAATTAATATTC                                 |
| pUT18-TolAIII <sup>Ec</sup>             | oLH207 | GCAGTGGAACGCCACTGCAGCGCAGAGGCAGATGATATTTTTCG                                     |
|                                         | oLH208 | GATGAATTCGAGCTCGGTACCACGGTTTGAAGTCCAATGGCGCG                                     |
| pKT25-pIII-N1 <sup>CTX</sup>            | oLH175 | CGCACGCGGGGGCTGCAGCTCCATCGGTAACGGCTTCC                                           |
|                                         | oLH176 | CTTAGTACTTAGGTACCGCAGACTTAAACGAGCTG                                              |
| pKT25 pIII-N2 <sup>CTX</sup>            | oLH226 | CGCACGCGGGGGCTGCAGCTGGGCTGAGCAGCTCGTTTAAGTC                                      |
|                                         | oLH211 | CTTAGTACTTAGGTACCCTGCTGCTATCGGGTGGCGTGGGATT                                      |
| pKT25-pIII-N1 <sup>M13</sup>            | oLH209 | CGCACGCGGGGGCTGCAGCTGCTGAAACTGTTGAAAGTTGTTTAGC                                   |
|                                         | oLH210 | CTTAGTACTTAGGTACCGAGCCACCACCCTCATTTTCAGGG                                        |
| pUT18-TolAIII <i>V. tasmaniensis</i>    | oLH363 | GCAGTGGAACGCCACTGCAGAGCGGCATTGAACGATATTTTTGC                                     |
|                                         | oLH364 | GATGAATTCGAGCTCGGTACCTCTGGTGATACAGTTAAGTTAATG                                    |
| pUT18-TolAIII <i>V. fischeri</i>        | oLH367 | GCAGTGGAACGCCACTGCAGAGCATTAAATGATATCTTTGCAG                                      |
|                                         | oLH368 | GATGAATTCGAGCTCGGTACTTCTGGTTGAACGGTAAGTTTATATTC                                  |
| pUT18-TolAIII <i>V. anguillarum</i>     | oLH369 | GCAGTGGAACGCCACTGCAGGGCGCTGAATAACATTTTTTCTGG                                     |
|                                         | oLH370 | GATGAATTCGAGCTCGGTACATTTGGTTCTACAGTTAAATTAATGTC                                  |
| pUT18-TolAIII <i>V. alginolyticus</i>   | oLH381 | GCAGTGGAACGCCACTGCAGAGAAGCAGCTGAGCGTGCCGAGCGTGA                                  |
|                                         | oLH382 | GATGAATTCGAGCTCGGTACGTCCAAAGCAACAGTTATGTTGATGTC                                  |
| pUT18-TolAIII <i>V. harveyi</i>         | oLH379 | GCAGTGGAACGCCACTGCAGAGAGCGTCTTGAGCGATTAGAGCG                                     |
|                                         | oLH380 | GATGAATTCGAGCTCGGTACATAATCAACCGTTAAGTTAACATCAG                                   |
| <b>Complementation construct</b>        |        |                                                                                  |
| pBAD-tolA <sup>Vc</sup>                 | oLH373 | GTTTTTTTGGGCTAGCGAATTCGAAGGAGATATACATACCCATGAAAG<br>AGAATAAGTCCAGAAAAAGTAATGATGC |
|                                         | oLH374 | TGCCTGCAGGTCGACTCTAGATTATTCAGGTGCTACGGTTAAATTAAT<br>ATTCTTTAG                    |
| <b>Periplasmic expression construct</b> |        |                                                                                  |
| pIN-pIII-N1 <sup>CTX</sup>              | oLH7   | TAGAATTCTGGTCTCATCCTCAATTTGAAAAACCATCGGTAACGGCTT<br>CCGCCATCAATTG                |
|                                         | oLH8   | TAGGATCCTCAATGGTGATGGTGATGATGCGCAGACTTAAACGAGCTG<br>CTCAG                        |
| <b>Quick Change mutagenesis</b>         |        |                                                                                  |
| TolAIII <sup>Vc</sup> (C292S)           | oLH105 | GTTTTTCGAGGAAAGCAGTCTAGGGTAAACCTAAAGCTTATTCCTACTG                                |
|                                         | oLH106 | GCTTTAGGTTTACCCTAGACTGCTTTCCTCGAAAAGTGTCTTCC                                     |
| TolAIII <sup>Vc</sup> (K324E-R325D)     | oLH109 | TTTATGTGCAGCAACCGAAGACGCTGTTGCCCAAGTGAATAG                                       |
|                                         | oLH110 | CTTGGGCAACAGCGTCTTCGGTTGCTGCACATAAACGACTG                                        |
| TolAIII <sup>Vc</sup> (K324E)           | oLH375 | TTTATGTGCAGCAACCGAAGACGCTGTTGCCCAAGTGAATAG                                       |
|                                         | oLH376 | CTTGGGCAACAGCGTCTTCGGTTGCTGCACATAAACGACTG                                        |
| TolAIII <sup>Vc</sup> (R325D)           | oLH377 | TTTATGTGCAGCAACCGAAGACGCTGTTGCCCAAGTGAATAG                                       |
|                                         | oLH378 | CTTGGGCAACAGCGTCTTTCGGTTGCTGCACATAAACGACTG                                       |
| TolAIII <sup>Vc</sup> (K347E)           | oLH234 | GTTGTGGAAAACTAGAGAATATTAATTTAACCG                                                |
|                                         | oLH235 | CGGTTAAATTAATATTTCTCTAGTTTTTCCACAAC                                              |

|                                    |        |                                                 |
|------------------------------------|--------|-------------------------------------------------|
| pIII-N1 <sup>CTX</sup> (C32S)      | oLH212 | GTTATTTGATGGCTCCATGCTTGAT                       |
|                                    | oLH213 | ATCAAGCATGGAGCCATCAAATAAC                       |
| pIII-N1 <sup>CTX</sup> (C47S)      | oLH214 | GTTTGGTCTTCTCTCTCAAATGAAAATG                    |
|                                    | oLH215 | CATTTTCATTTGAGAGAGAAGACCAAAC                    |
| pIII-N1 <sup>CTX</sup> (C75S)      | oLH216 | GCATCTGCAGAGCGCTCCATTTATCC                      |
|                                    | oLH217 | GGATAAATGGAGCGCTCTGCAGATGC                      |
| pIII-N1 <sup>CTX</sup> (C96S)      | oLH224 | GCATTTATCCTTATTCCCCTGAGGGG                      |
|                                    | oLH225 | CCCCTCAGGGGAATAAGGATAAATGC                      |
| pIII-N1 <sup>CTX</sup> (E37Q-D39N) | oLH113 | GGCTGCATGCTTGATATTCAAAAAAATGACTATGGTTTTGTTGGTC  |
|                                    | oLH114 | GACCAAACAAAACCATAGTCATTTTTTTGAATATCAAGCATGCAGCC |
| pIII-N1 <sup>CTX</sup> (E37K-D39R) | oLH220 | GGCTGCATGCTTGATATTAAAAAACGTGACTATGGTTTTGTTGGTC  |
|                                    | oLH221 | GACCAAACAAAACCATAGTCACGTTTTTTAATATCAAGCATGCAGCC |
| pIII-N1 <sup>CTX</sup> (E92K)      | oLH222 | ATCCTTATTGCCCTAAGGGGAAGAGTGC                    |
|                                    | oLH223 | GCACTCTTCCCCCTTAGGGCAATAAGGAT                   |
| ToIAIII <i>V. harveyi</i> (S325R)  | oLH388 | CTTGATTAAGTGCCTCTTTGCTGC                        |
|                                    | oLH389 | GTATGTGCGGCTGCGAAGAGAGCGATTGCGCAGGTAG           |
